# Supplementary material for: Assistive Technologies in Healthcare: Utilization and Healthcare Workers Perceptions in Germany
Source: Research Square preprint supplement (doi:10.21203/rs.3.rs-5363694/v1), 2024-11-12
Supplement: Supplementary file [file 0aad16cfb16c04620a9a5977.pdf]

## Appendix A Inclusion Criteria for the study

Table A1 visualizes the inclusion- and exclusion.

**Table A1** Inclusion and Exclusion Criteria

| Inclusion Criteria                    | Exclusion Criteria                    |
|---------------------------------------|---------------------------------------|
| HCW working in healthcare in Bavaria. | Individuals not working in healthcare |
| Currently working and employed HCW.   | Former, retired, or on sick leave HCW |
| Voluntarily and informed consent      | Informed consent not given or unable  |

## Appendix B Questionnaire

The following appendix lists the questions of our online survey on assistive technologies in healthcare to provide a comprehensive overview and offer a tool for other authors in related research.

### B.1 Introduction

**Study on Technologies in Healthcare** - *An initiative by the Deggendorf Institute of Technology, FAU Erlangen-Nuremberg, and Augsburg Institute of Technology.*

---

Welcome! Your opinion on assistive technologies is essential to us!

**Key Information on the Survey:**

- All healthcare professionals from all regions of Germany are warmly invited.
- The goal is to obtain a nationwide perspective on technologies in healthcare.
- The survey takes approximately 10 minutes to complete.
- Your responses are collected in a privacy-friendly manner and under high-security standards.

Thank you for your support!

---

### B.2 Demographic Data

1. What is your gender?

☐ Male

☐ Female

☐ Diverse

2. What is your age?

-----

3. How would you rate your knowledge of new technologies?

☐ No skills

☐ Beginner

☐ Advanced

☐ Expert

4. In which conurbation do you work?
  - ☐ Under 5,000 inhabitants
  - ☐ 5,001 to 20,000 inhabitants
  - ☐ 20,001 to 100,000 inhabitants
  - ☐ Over 100,000 inhabitants
5. How long have you worked in healthcare?  
 -----
6. What is your role in care?
  - ☐ Specialist doctor
  - ☐ Assistant doctor
  - ☐ Nursing professional
  - ☐ Nursing assistant
  - ☐ Administration (medical specialists, documentalists, etc.)
  - ☐ Other: -----
7. Your area of work can be categorized as follows:
  - ☐ Inpatient nursing care (e.g., clinics/rehab)
  - ☐ Doctor in a clinical environment (e.g., hospital doctor)
  - ☐ General practitioner
  - ☐ Emergency room
  - ☐ Intensive care
  - ☐ Administration/management in the hospital environment
  - ☐ Administration/Management in elderly care
  - ☐ Other: -----

### B.3 Utilisation of Digital Solutions

1. What digital solutions do you use in your professional environment? (Software)
  - Text editors (e.g., Word)
    - ☐ Daily
    - ☐ Weekly
    - ☐ Monthly
    - ☐ Never
  - Spreadsheets (e.g., Excel)
    - ☐ Daily
    - ☐ Weekly
    - ☐ Monthly
    - ☐ Never
  - Calendar/Scheduling (e.g., duty rosters)
    - ☐ Daily
    - ☐ Weekly
    - ☐ Monthly
    - ☐ Never
  - Communication platforms (e.g., WhatsApp, MS Teams, e-mail, chatbots)
    - ☐ Daily
    - ☐ Weekly
    - ☐ Monthly

- ☐ Never
- Patient education software
  - ☐ Daily
  - ☐ Weekly
  - ☐ Monthly
  - ☐ Never
- Electronic health record/care documentation
  - ☐ Daily
  - ☐ Weekly
  - ☐ Monthly
  - ☐ Never
- Hospital information systems (HIS/ERP such as CGM Clinical)
  - ☐ Daily
  - ☐ Weekly
  - ☐ Monthly
  - ☐ Never
- Voice-to-text programs
  - ☐ Daily
  - ☐ Weekly
  - ☐ Monthly
  - ☐ Never
- Software for telemedicine
  - ☐ Daily
  - ☐ Weekly
  - ☐ Monthly
  - ☐ Never
- Decision support systems (e.g., diagnostic suggestions)
  - ☐ Daily
  - ☐ Weekly
  - ☐ Monthly
  - ☐ Never
- Knowledge management (e.g., UpToDate)
  - ☐ Daily
  - ☐ Weekly
  - ☐ Monthly
  - ☐ Never
- Translation software
  - ☐ Daily
  - ☐ Weekly
  - ☐ Monthly
  - ☐ Never
- Other: -----
  - ☐ Daily
  - ☐ Weekly
  - ☐ Monthly
  - ☐ Never

2. What digital solutions do you use in your professional environment? (Hardware)
- Mobile communication (e.g., mobile phones, DECT)
    - ☐ Daily
    - ☐ Weekly
    - ☐ Monthly
    - ☐ Never
  - Mobile patient data recording (e.g., tablets)
    - ☐ Daily
    - ☐ Weekly
    - ☐ Monthly
    - ☐ Never
  - Medical devices without interfaces
    - ☐ Daily
    - ☐ Weekly
    - ☐ Monthly
    - ☐ Never
  - Medical devices with interfaces
    - ☐ Daily
    - ☐ Weekly
    - ☐ Monthly
    - ☐ Never
  - Body-worn sensors
    - ☐ Daily
    - ☐ Weekly
    - ☐ Monthly
    - ☐ Never
  - Sensors in the building
    - ☐ Daily
    - ☐ Weekly
    - ☐ Monthly
    - ☐ Never
  - Fax
    - ☐ Daily
    - ☐ Weekly
    - ☐ Monthly
    - ☐ Never
  - Printer
    - ☐ Daily
    - ☐ Weekly
    - ☐ Monthly
    - ☐ Never
  - Scanner with OCR
    - ☐ Daily
    - ☐ Weekly
    - ☐ Monthly
    - ☐ Never

- Physical robots
  - ☐ Daily
  - ☐ Weekly
  - ☐ Monthly
  - ☐ Never
- Identification systems
  - ☐ Daily
  - ☐ Weekly
  - ☐ Monthly
  - ☐ Never
- Other: -----
  - ☐ Daily
  - ☐ Weekly
  - ☐ Monthly
  - ☐ Never

## B.4 Perceived Usefulness

1. Rank the software that helps you do your job better. (Select up to 3)
  - ☐ Text editors
  - ☐ Spreadsheets
  - ☐ Calendar/Scheduling
  - ☐ Communication platforms
  - ☐ Patient education software
  - ☐ Electronic health records
  - ☐ Hospital information systems
  - ☐ Voice-to-text programs
  - ☐ Telemedicine
  - ☐ Decision support systems
  - ☐ Knowledge management
  - ☐ Translation software
2. Rank the hardware that helps you do your job better. (Select up to 3)
  - ☐ Mobile communication
  - ☐ Mobile patient data recording
  - ☐ Medical devices without interfaces
  - ☐ Medical devices with interfaces
  - ☐ Body-worn sensors
  - ☐ Sensors in the building
  - ☐ Fax
  - ☐ Printer
  - ☐ Scanner with OCR
  - ☐ Physical robots
  - ☐ Identification systems

## B.5 Story Stems

Please continue writing the story. There are no limits. Be yourself. For example, challenges in daily work can be described in the first part of the story. The second part can then show solutions. (Please don't write names and other personal data in the fields)

1. As a healthcare employee, you have the freedom to organize your daily tasks more effectively. Together with your colleagues, you have identified the biggest challenges in your work, which are primarily...  
-----
2. Fortunately, you recently visited a trade fair where you were presented with a solution to your problems. The technological advances presented opened up new, promising possibilities by ...  
-----

## B.6 Thank you!

You have contributed significantly to research into assistive technologies in healthcare. With your input, we can develop solutions for current challenges.

## Appendix C Bivariate Statistics

**Table C2** Bivariate Statistics between Software and Gender

| Software                     | $\chi^2$ Value                      | Cramer's V         |
|------------------------------|-------------------------------------|--------------------|
| Text editors                 | $\chi^2$ value = 1.749, $p$ = 0.626 | Cramer's V = 0.072 |
| Spreadsheets                 | $\chi^2$ value = 2.511, $p$ = 0.473 | Cramer's V = 0.086 |
| Calendar/Scheduling          | $\chi^2$ value = 0.624, $p$ = 0.891 | Cramer's V = 0.043 |
| Communication Platforms      | $\chi^2$ value = 3.689, $p$ = 0.297 | Cramer's V = 0.104 |
| Patient education software   | $\chi^2$ value = 4.839, $p$ = 0.184 | Cramer's V = 0.121 |
| Electronic Health Record     | $\chi^2$ value = 5.352, $p$ = 0.148 | Cramer's V = 0.127 |
| Hospital Information Systems | $\chi^2$ value = 3.919, $p$ = 0.270 | Cramer's V = 0.109 |
| Voice-to-text programs       | $\chi^2$ value = 3.113, $p$ = 0.375 | Cramer's V = 0.097 |
| Televisits-/medicine/nursing | $\chi^2$ value = 0.703, $p$ = 0.873 | Cramer's V = 0.046 |
| Decision support systems     | $\chi^2$ value = 4.848, $p$ = 0.183 | Cramer's V = 0.121 |
| Knowledge management         | $\chi^2$ value = 0.711, $p$ = 0.871 | Cramer's V = 0.046 |
| Translation programmes       | $\chi^2$ value = 5.204, $p$ = 0.157 | Cramer's V = 0.125 |
| Other software*              | $\chi^2$ value = 7.943, $p$ = 0.047 | Cramer's V = 0.155 |

\* Includes software not categorized elsewhere; only significant value,  $\alpha = 0.05$  for significance

**Table C3** Bivariate Statistics between Hardware and Gender

| Hardware/Devices                | $\chi^2$ Value                       | Cramer's V         |
|---------------------------------|--------------------------------------|--------------------|
| Mobile Communication            | $\chi^2$ value = 7.464, $p$ = 0.058  | Cramer's V = 0.149 |
| Patient Data Recording          | $\chi^2$ value = 2.361, $p$ = 0.501  | Cramer's V = 0.084 |
| Med. Devices without Interfaces | $\chi^2$ value = 0.505, $p$ = 0.918  | Cramer's V = 0.018 |
| Med. Devices with Interfaces    | $\chi^2$ value = 2.066, $p$ = 0.559  | Cramer's V = 0.079 |
| Body-Worn Sensors               | $\chi^2$ value = 2.748, $p$ = 0.432  | Cramer's V = 0.092 |
| Sensors in the Building         | $\chi^2$ value = 0.994, $p$ = 0.803  | Cramer's V = 0.055 |
| Fax                             | $\chi^2$ value = 0.750, $p$ = 0.861  | Cramer's V = 0.048 |
| Printer                         | $\chi^2$ value = 2.750, $p$ = 0.432  | Cramer's V = 0.091 |
| Scanners                        | $\chi^2$ value = 2.825, $p$ = 0.419  | Cramer's V = 0.092 |
| Physical Robots                 | $\chi^2$ value = 5.160, $p$ = 0.160  | Cramer's V = 0.126 |
| Identification Devices          | $\chi^2$ value = 5.973, $p$ = 0.113  | Cramer's V = 0.134 |
| Other Hardware*                 | $\chi^2$ value = 10.504, $p$ = 0.015 | Cramer's V = 0.181 |

\* Includes hardware not categorized elsewhere; only significant value,  $\alpha$  = 0.05 for significance

**Table C4** Daily Usage of Software by HCW roles (N=371, sorted by total usage)

| Daily Software Usage                      | Admins<br>n (%) | Nurses<br>n (%) | Doctors<br>n (%) | Total |
|-------------------------------------------|-----------------|-----------------|------------------|-------|
| Communication Platforms <sup>-</sup>      | 101<br>(38.7 %) | 68 (26.1 %)     | 25 (9.6 %)       | 261   |
| Text editors <sup>1</sup>                 | 88 (40.9 %)     | 51 (23.7 %)     | 20 (9.3 %)       | 215   |
| Calendar/Scheduling <sup>2</sup>          | 96 (45.5 %)     | 53 (25.1 %)     | 13 (6.2 %)       | 211   |
| Electronic Health Record <sup>3</sup>     | 52 (30.2 %)     | 66 (38.4 %)     | 15 (8.7 %)       | 172   |
| Spreadsheets <sup>4</sup>                 | 68 (54.4 %)     | 25 (20.0 %)     | 6 (4.8 %)        | 125   |
| Knowledge management <sup>-</sup>         | 49 (40.5 %)     | 32 (26.4 %)     | 14 (11.6 %)      | 121   |
| Other software <sup>-</sup>               | 40 (38.5 %)     | 28 (26.9 %)     | 12 (11.5 %)      | 104   |
| Hospital Information Systems <sup>5</sup> | 36 (38.3 %)     | 34 (36.2 %)     | 10 (10.6 %)      | 94    |
| Translation programmes <sup>-</sup>       | 29 (54.7 %)     | 8 (15.1 %)      | 3 (5.7 %)        | 53    |
| Patient education software <sup>6</sup>   | 14 (45.2 %)     | 6 (19.4 %)      | 5 (16.1 %)       | 31    |
| Voice-to-text programs <sup>7</sup>       | 15 (42.9 %)     | 5 (14.3 %)      | 6 (17.1 %)       | 35    |
| Decision support systems <sup>8</sup>     | 16 (47.1 %)     | 12 (35.3 %)     | 1 (2.9 %)        | 34    |
| Televisits-/medicine/nursing <sup>-</sup> | 12 (42.9 %)     | 6 (21.4 %)      | 5 (17.9 %)       | 28    |

<sup>-</sup> No significance in  $\chi^2$ -tests % within each software category <sup>1</sup>  $\chi^2$  value = 53.107,  $p$  = 0.000, Cramer's V = 0.237 <sup>2</sup>  $\chi^2$  value = 48.256,  $p$  = 0.001, Cramer's V = 0.226 <sup>3</sup>  $\chi^2$  value = 55.823,  $p$  = 0.000, Cramer's V = 0.245 <sup>4</sup>  $\chi^2$  value = 77.605,  $p$  = 0.000, Cramer's V = 0.287 <sup>5</sup>  $\chi^2$  value = 32.656,  $p$  = 0.050, Cramer's V = 0.187 <sup>6</sup>  $\chi^2$  value = 33.994,  $p$  = 0.036, Cramer's V = 0.191 <sup>7</sup>  $\chi^2$  value = 50.220,  $p$  = 0.000, Cramer's V = 0.232 <sup>8</sup>  $\chi^2$  value = 34.065,  $p$  = 0.036, Cramer's V = 0.191

**Table C5** Daily Usage of Hardware by HCW Roles (N=371, sorted by total usage)

| Daily Hardware Usage                         | Admins<br>n (%) | Nurses<br>n (%) | Doctors<br>n (%) | Total |
|----------------------------------------------|-----------------|-----------------|------------------|-------|
| Mobile Communication <sup>-</sup>            | 98 (36.3 %)     | 80 (29.6 %)     | 22 (8.1 %)       | 270   |
| Printer <sup>-</sup>                         | 88 (39.3 %)     | 59 (26.3 %)     | 24 (10.7 %)      | 224   |
| Patient Data Recording <sup>-</sup>          | 49 (34.5 %)     | 41 (28.9 %)     | 14 (9.9 %)       | 142   |
| Sensors in the Building <sup>-</sup>         | 61 (43.3 %)     | 37 (26.2 %)     | 8 (5.7 %)        | 141   |
| Med. Devices without Interfaces <sup>1</sup> | 26 (21.5 %)     | 45 (37.2 %)     | 20 (16.5 %)      | 121   |
| Scanners <sup>2</sup>                        | 53 (50.0 %)     | 22 (20.8 %)     | 8 (7.5 %)        | 106   |
| Body-Worn Sensors <sup>3</sup>               | 41 (46.6 %)     | 23 (26.1 %)     | 3 (3.4 %)        | 88    |
| Med. Devices with Interfaces <sup>4</sup>    | 20 (23.0 %)     | 34 (39.1 %)     | 16 (18.4 %)      | 87    |
| Fax <sup>5</sup>                             | 24 (28.9 %)     | 24 (28.9 %)     | 15 (18.1 %)      | 83    |
| Other Hardware <sup>-</sup>                  | 21 (33.9 %)     | 16 (25.8 %)     | 11 (17.7 %)      | 62    |
| Identification Devices <sup>6</sup>          | 25 (40.3 %)     | 8 (12.9 %)      | 16 (25.8 %)      | 62    |
| Physical Robots <sup>-</sup>                 | 2 (28.6 %)      | 3 (42.9 %)      | 0 (0.0 %)        | 7     |

<sup>-</sup> No significance in  $\chi^2$ -tests <sup>1</sup>  $\chi^2$  value = 64.853,  $p$  = 0.000, Cramer's V = 0.264 <sup>2</sup>  $\chi^2$  value = 32.780,  $p$  = 0.049, Cramer's V = 0.187 <sup>3</sup>  $\chi^2$  value = 43.171,  $p$  = 0.003, Cramer's V = 0.217 <sup>4</sup>  $\chi^2$  value = 58.745,  $p$  = 0.000, Cramer's V = 0.252 <sup>5</sup>  $\chi^2$  value = 41.150,  $p$  = 0.005, Cramer's V = 0.210 <sup>6</sup>  $\chi^2$  value = 58.244,  $p$  = 0.000, Cramer's V = 0.250
